# Supplementary material
Source: MDPI journal article supplement (https://www.mdpi.com/2073-4344/9/11/949)
Supplement: s1 [file s1]

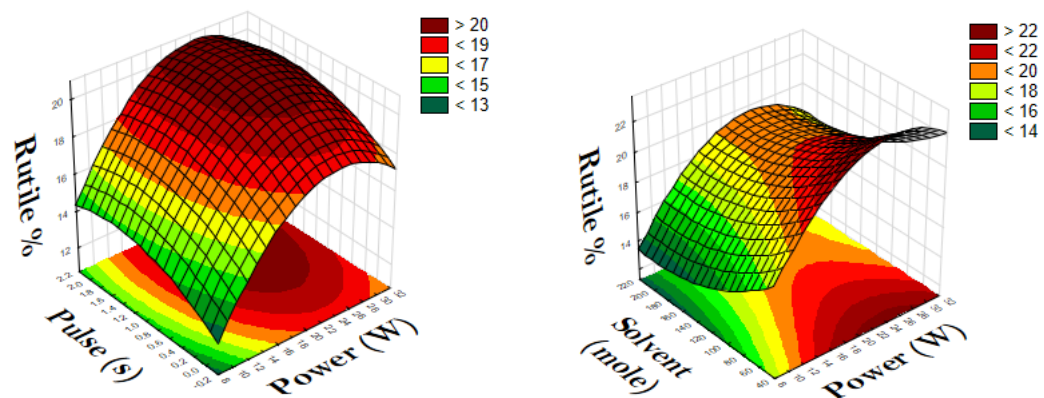

Figure S-1. Effect of ultrasound power on Rutile %

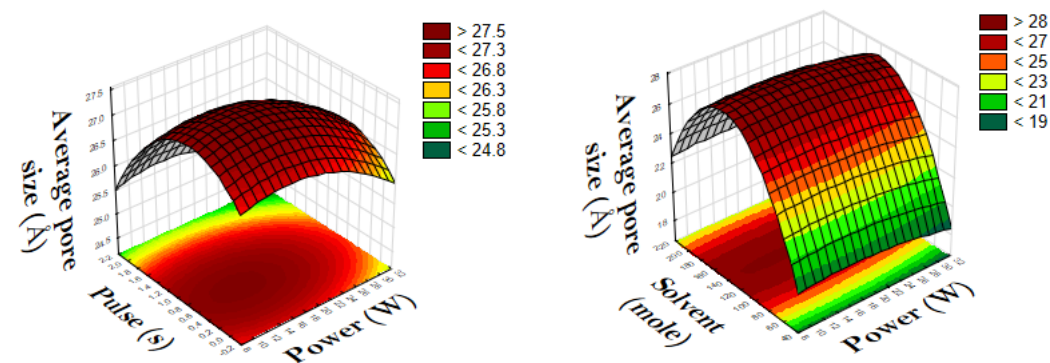

Figure S-2. Effect of ultrasound power on average pore size

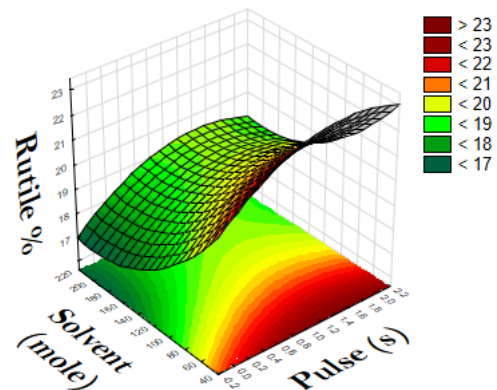

Figure S-3. Effect of ultrasound pulse and solvent on Rutile %

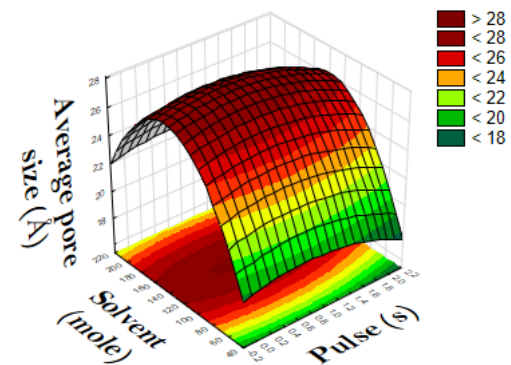

Figure S-4. Effect of ultrasound pulse and solvent on average pore size

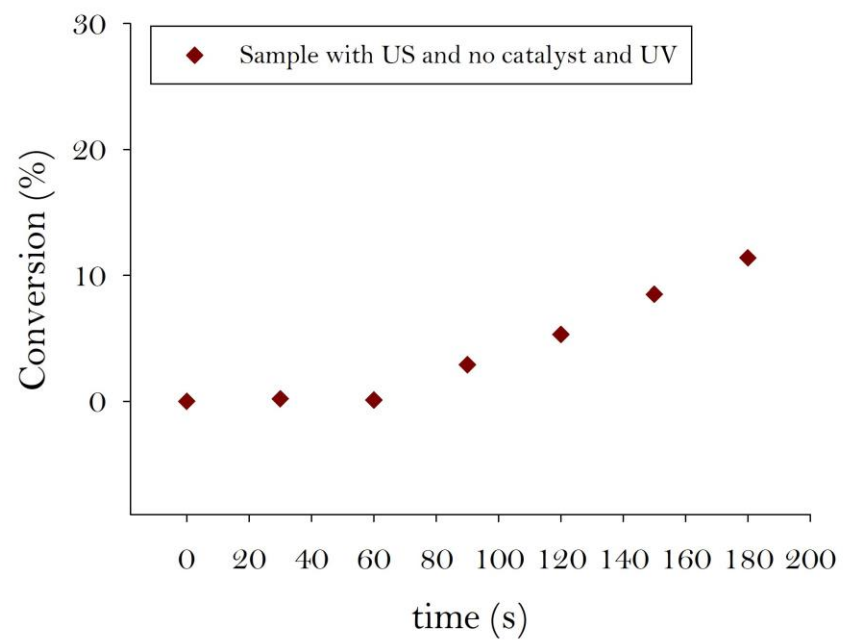

Figure S-5. Acetaminophen degradation in the absence of photocatalysis

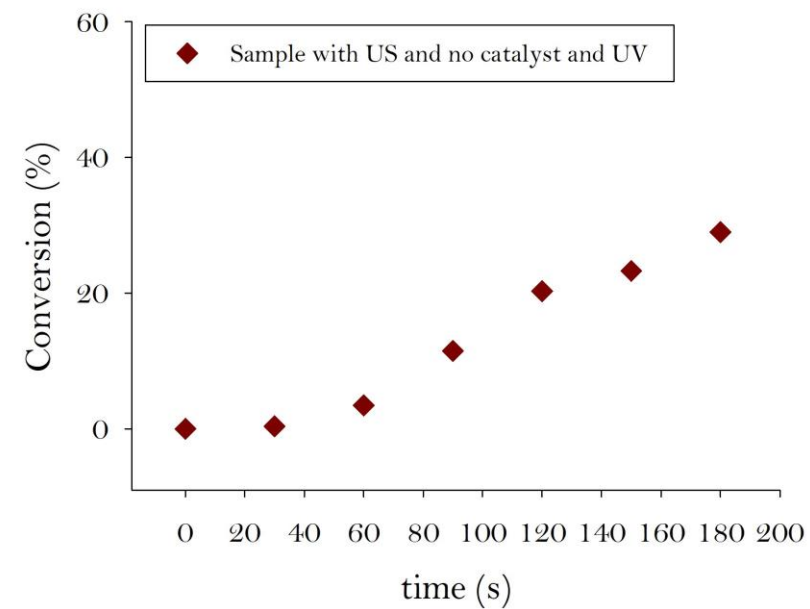

Figure S-6. Amoxicillin degradation in the absence of photocatalysis
